# Supplementary material for: Experimental evidence of dual emission in a negatively solvatochromic push–pull pyridinium derivative
Source: Royal Society of Chemistry journal article supplement (doi:10.1039/c4cp04963b), 2014-11-27
Supplement: c4cp04963b1.pdf [file c4cp04963b1.pdf]

## Supporting Information

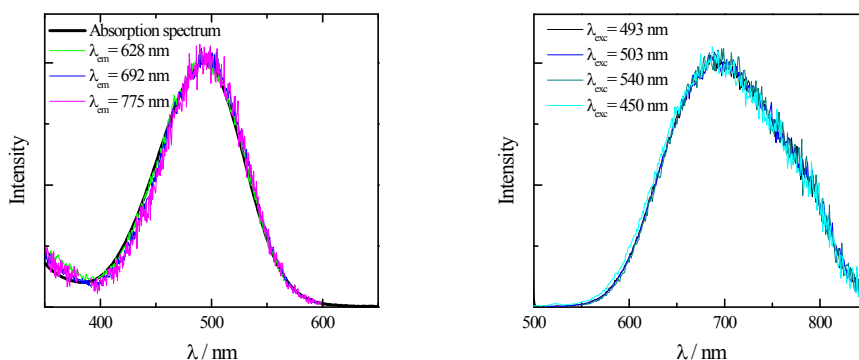

**Figure S1.** Normalized fluorescence excitation and emission spectra in DCM as a function of the emission ( $\lambda_{em}$ ) and excitation ( $\lambda_{exc}$ ) wavelengths, respectively. The absorption spectrum is also shown.

**Table S1.** Temperature effect on the fluorescence maxima and quantum yields in EPA.

| T/K | $\lambda_{em}/nm$ | $\phi_F$ |
|-----|-------------------|----------|
| 293 | 650               | 0.019    |
| 280 | 650               | 0.023    |
| 265 | 650               | 0.032    |
| 250 | 650               | 0.044    |
| 235 | 650               | 0.057    |
| 220 | 650               | 0.078    |
| 205 | 650               | 0.11     |
| 190 | 650               | 0.16     |
| 140 | 640               | 0.55     |
| 120 | 600               | 0.85     |
| 83  | 522               | 0.97     |

A treatment of  $\phi_F$  data in Table S2 according to the Arrhenius equation (1) is reported in Fig. S1:

$$\ln\left(\frac{\phi_F^{lim}}{\phi_F} - 1\right) = \ln(A\tau_F^{lim}) - \frac{\Delta E_a}{RT} \quad (1)$$

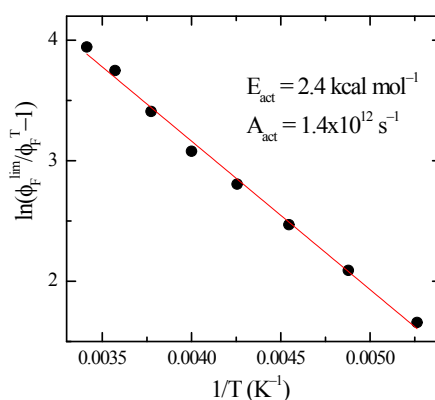

**Figure S2.** Plot of the fluorescence quantum yields according to the Arrhenius-type equation.

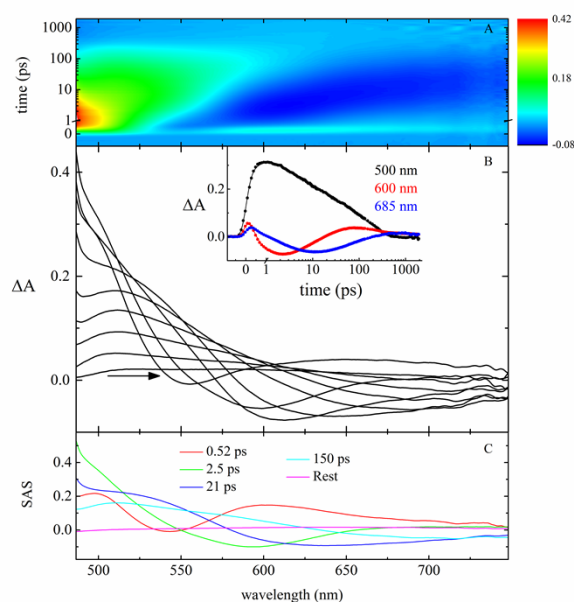

**Figure S3.** Pump-probe absorption ( $\lambda_{\text{exc}}=400$  nm) in EPA: A) contour plot of the experimental data, B) time resolved absorption spectra recorded at different delays after the laser pulse. Insets: decay kinetics recorded at meaningful wavelengths together with the corresponding fitting traces and C) Species Associated Spectra (SAS) of the decay components obtained by Target Analysis.

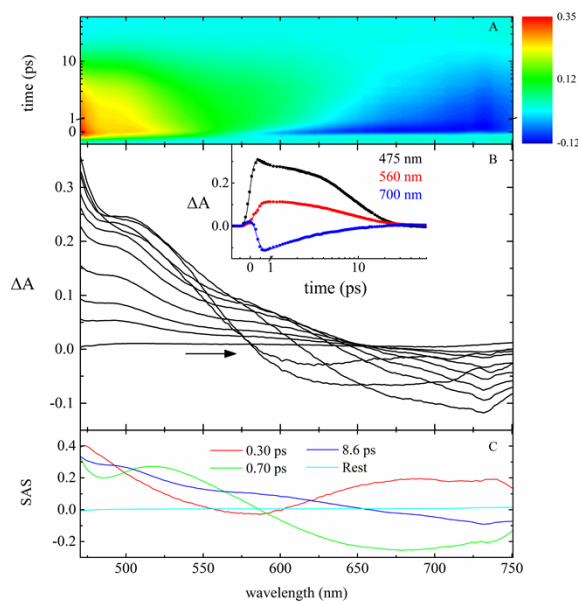

**Figure S4.** Pump-probe absorption ( $\lambda_{\text{exc}}=400$  nm) in W: A) contour plot of the experimental data, B) time resolved absorption spectra recorded at different delays after the laser pulse. Insets: decay kinetics recorded at meaningful wavelengths together with the corresponding fitting traces and C) Species Associated Spectra (SAS) of the decay components obtained by Target Analysis.
